# Supplementary material for: Complementary hydrogen bonding in a new tridentate Schiff base ligand: X-ray, DFT and solution NMR studiesElectronic supplementary information (ESI) available: unit cell packing diagram for 3 (Fig. S1) and 1H NMR spectra of 3 as a function of the concentration of added H2O in CDCl3 solution (Fig. S2). See http://www.rsc.org/suppdata/nj/b3/b305946d/
Source: Royal Society of Chemistry journal article supplement (doi:10.1039/b305946d), 2004-01-01
Supplement: b305946d.pdf [file b305946d.pdf]

## Supporting Information:

### Complementary Hydrogen Bonding in a New Tridentate Schiff Base Ligand: X-Ray, DFT, and Solution NMR Studies

Orde Q. Munro,\* Sandra D. Strydom, and Craig D. Grimmer

*School of Chemical and Physical Sciences, University of Natal, Pietermaritzburg, Private Bag X01, Scottsville, 3209, South Africa. Fax: 27 33 260 5009; Tel: 27 33 260 5009; E-mail: [munroo@nu.ac.za](mailto:munroo@nu.ac.za)*

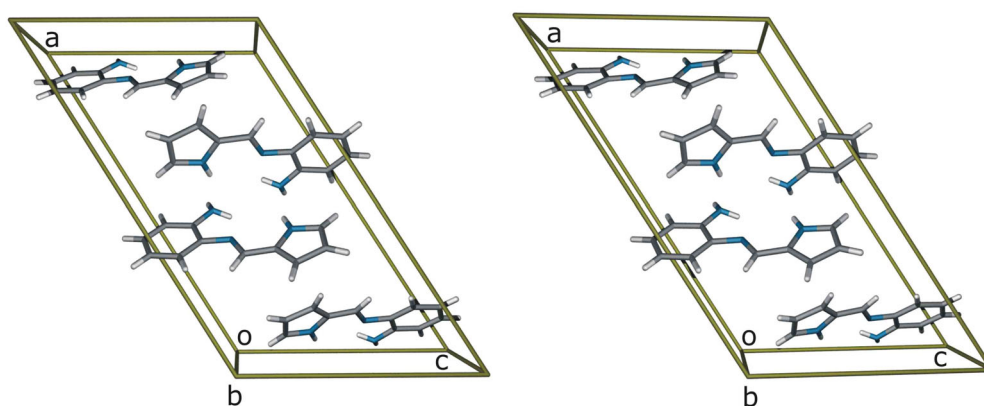

**Fig. S1.** Stereo view of the unit cell contents of the crystal structure of *N*-[(1*E*)-1*H*-pyrrol-2-ylmethylene]-benzene-1,2-diamine.

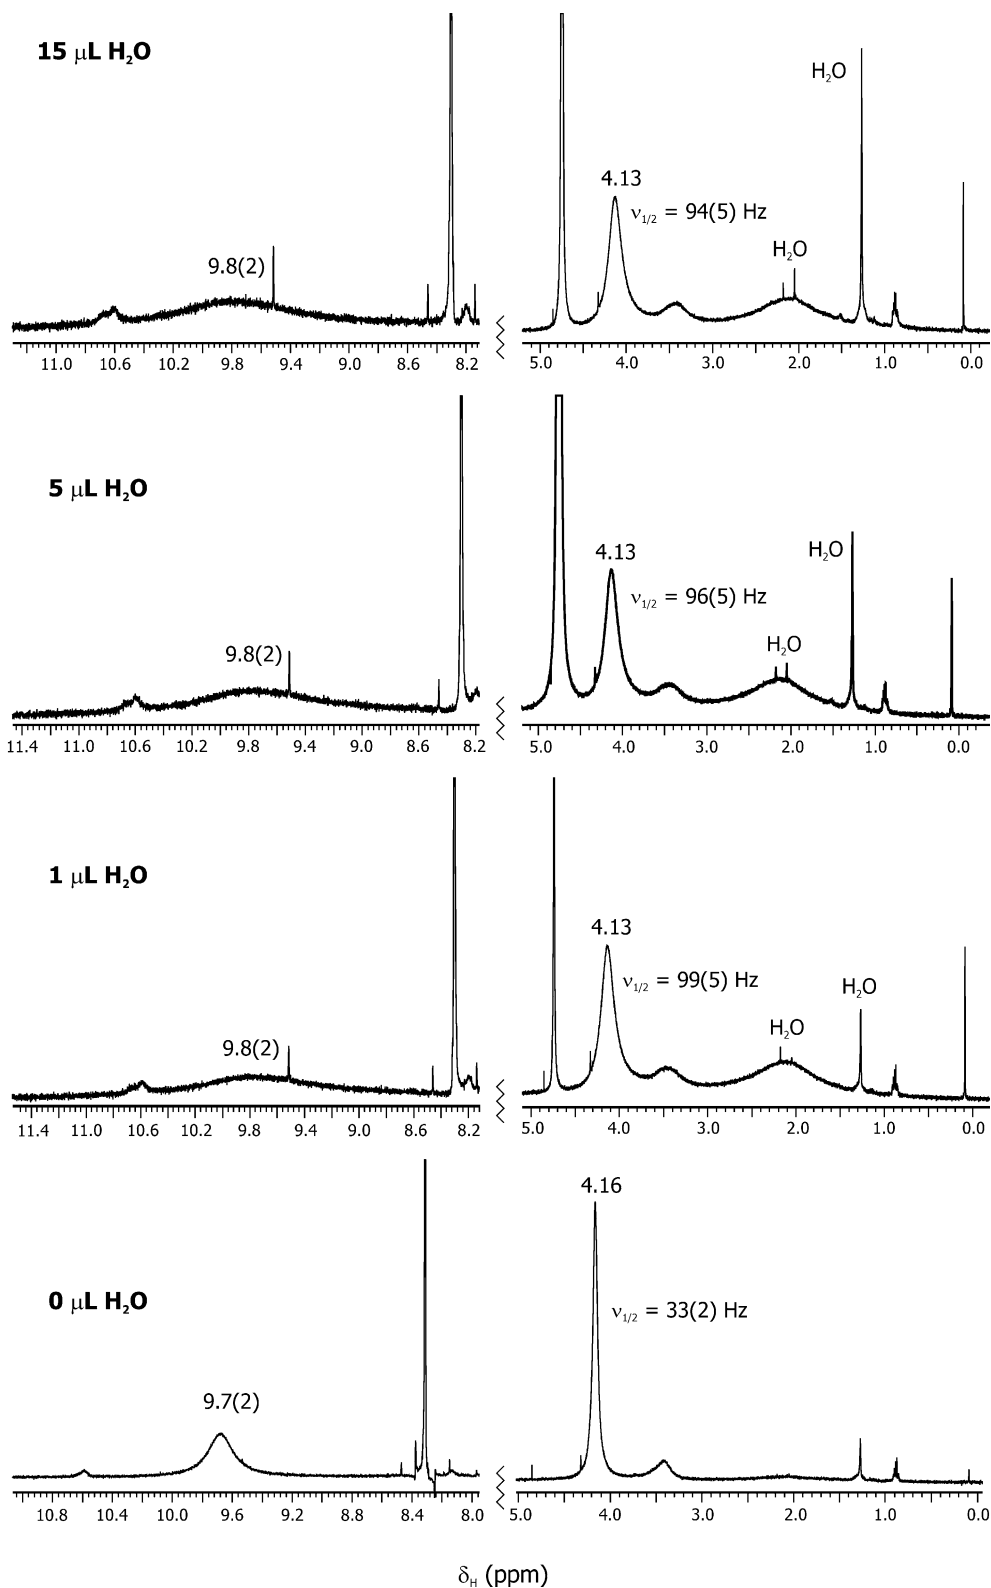

**Fig. S2.**  $^1\text{H}$  NMR spectra of a 10 mg sample of *N*-[(1*E*)-1*H*-pyrrol-2-ylmethylene]-benzene-1,2-diamine dissolved in 500  $\mu\text{L}$   $\text{CDCl}_3$  as a function of the volume of added distilled water. Only the  $\text{ArNH}_2$  ( $\delta_{\text{H}} = 4.16$  ppm) and pyrrole NH proton ( $\delta_{\text{H}} = 9.7(2)$  ppm) regions of the spectra have been shown for clarity.
